# Supplementary material
Source: PubMed Central journal article supplement (PMC3396509)
Supplement: 1204947109_pnas.201204947SI.pdf [file 1204947109_pnas.201204947SI.pdf]

# Supporting Information

Rougemaille et al. 10.1073/pnas.1204947109

## SI Methods

**Strain Construction.** Homologous replacement of DNA was accomplished by lithium acetate transformation of PCR products containing 100 or 500 bp of targeting homology. YES media [5 g/L Difco yeast extract, 250 mg/L of each L-histidine, L-leucine, adenine, uracil, L-lysine, and 3% (wt/vol) glucose] was used in all experiments and FOA media contained 1 g/L 5-fluoroorotic acid.

**Yeast Two-Hybrid Analysis.** Bait plasmids containing fusion proteins of components of *Schizosaccharomyces pombe* heterochromatin silencing machinery were transformed into EGY48, whereas prey plasmids containing the fusion proteins were transformed into YM3855. See Table S6 for plasmids. Respective bait and prey strains were combined by mating before yeast two-hybrid analysis and  $\beta$ -galactosidase plate and liquid assays were performed in diploid cells.

**Protein Cloning and Purification.** Full-length Swi6 was cloned into pET30a (Novagen), and Swi6 proteins were purified from *Escherichia coli* Rosetta (DE3) pLysS strains using Cobalt-NTA affinity resin (Clontech) followed by size-exclusion chromatography on a Superdex 200HR 10/300 column (GE Healthcare). Protein was eluted in 25 mM Hepes pH 7.5, 100 mM KCl, and 10% glycerol and stored at  $-80^\circ\text{C}$ .

Ers1 fragment 2 was cloned into pMAL (NEB) containing an N-terminal maltose-binding protein (MBP) tag and a C-terminal 6 $\times$ His-tag. Ers1 fragment 2 proteins were purified from *E. coli* Rosetta (DE3) pLysS strains. Cells were grown to  $\text{OD}_{600} = 0.4$  at  $37^\circ\text{C}$  in 2 $\times$  LB with 50  $\mu\text{g}/\text{mL}$  carbenicillin. Isopropyl- $\beta$ -D-thiogalactopyranoside (IPTG) was added to a concentration of 0.4 mM to induce protein expression, and cells were incubated overnight at  $18^\circ\text{C}$ . Harvested cells were resuspended in lysis buffer (1 $\times$  PBS buffer pH 7.5, 300 mM KCl, 10% glycerol, 1  $\mu\text{g}/\text{mL}$  pepstatin A, 3  $\mu\text{g}/\text{mL}$  leupeptin, 2  $\mu\text{g}/\text{mL}$  aprotinin, and 1 mM PMSF). Following sonication, cell debris was removed by centrifugation at 25,000  $\times g$  for 30 min. Cell lysate supernatants were incubated for 1 h at  $4^\circ\text{C}$  with amylose resin (NEB). Resin was washed with lysis buffer and proteins eluted with lysis buffer containing 40 mM maltose. Proteins were further purified using Cobalt-NTA affinity resin (Clontech). Protein was incubated with resin for 1 h at  $4^\circ\text{C}$  in 20 mM Hepes pH 7.5, 150 mM KCl, 10% glycerol, and 7.5 mM imidazole. Beads were washed with the same buffer and proteins eluted with buffer containing 500 mM imidazole. Purified Ers1 fragment 2 was then dialyzed and stored in 20 mM Hepes pH 7.5, 150 mM KCl, 10% glycerol, and 1 mM DTT.

**In Vitro Pull-Down Experiments.** To test interactions between recombinant Swi6 and recombinant Ers1 fragment 2, recombinant Swi6 was bound to M2 agarose beads (Sigma) by incubating 3  $\mu\text{g}$  of either 6 $\times$ His-Swi6-FLAG or 6 $\times$ His-Swi6(L315D)-FLAG with 25  $\mu\text{L}$  of resin that had been equilibrated with IP buffer (20 mM Hepes-KOH pH 7.5, 200 mM KCl, 2 mM  $\text{MgCl}_2$ , 10% glycerol, 0.1% Tween-20). After 1 h binding at  $4^\circ\text{C}$ , resin was washed three times with IP buffer and then incubated with either 1.2  $\mu\text{g}$  of MBP or 1.2  $\mu\text{g}$  of MBP-Ers1 fragment 2-6 $\times$ His. After 2 h binding at  $4^\circ\text{C}$ , resin was washed three times with IP buffer. Proteins were eluted by incubating resin with 50  $\mu\text{L}$  of 200  $\mu\text{g}/\text{mL}$  3 $\times$ -FLAG peptide for 30 min at  $4^\circ\text{C}$ . The samples were boiled at  $100^\circ\text{C}$  for 5 min after the addition of 2 $\times$  SDS sample buffer and were analyzed by SDS/PAGE and Western using 1:2,000 polyclonal rabbit anti-MBP (Abcam; Ab9084) and 1:1,500 monoclonal rabbit anti-FLAG (Sigma; F7425).

To test interactions between recombinant Swi6 and proteins present in cell lysate, *S. pombe* cultures were grown to  $\text{OD}_{600} = 1.8$  at  $30^\circ\text{C}$ , at which point they were washed in lysis buffer (20 mM Hepes-KOH pH 7.5, 200 mM KCl, 10% glycerol, 0.1% Tween-20, 2 $\times$  EDTA-free complete protease inhibitor; Roche), harvested, then lysed by mechanical disruption using a coffee grinder (3 min) and mortar and pestle (15 min). The frozen powder was resuspended in lysis buffer and cleared by 27,000  $\times g$  centrifugation for 40 min at  $4^\circ\text{C}$ . Recombinant Swi6 was bound to TALON metal affinity resin (Clontech) by incubating 5  $\mu\text{g}$  6 $\times$ His-Swi6-FLAG with 25  $\mu\text{L}$  of resin that had been equilibrated in lysis buffer. After 1 h binding at  $4^\circ\text{C}$ , the TALON resin was washed three times with lysis buffer and then incubated with cleared lysate. After 2 h binding at  $4^\circ\text{C}$ , the TALON resin was washed three times with wash buffer (20 mM Hepes-KOH pH 7.5, 150 mM KCl, 10% glycerol, 0.1% Tween-20, 1 $\times$  EDTA-free complete, 5 mM imidazole). Proteins were eluted by incubating resin in SDS sample buffer at  $100^\circ\text{C}$  for 5 min and were analyzed by SDS/PAGE and Western blotting using 1:3,000 monoclonal mouse anti-FLAG (Sigma; F3165) and 1:2,500 rabbit polyclonal anti-PSTAIR (Santa Cruz Biotechnology; SC-53).

**Chromatin Immunoprecipitation.** CHIP analyses were performed as described (1).

**RNA Extraction and RT-qPCR Analyses.** This was carried out as described (1), except for the following modifications: 5–10  $\mu\text{g}$  of RNA was used in reverse transcription reactions using 200 units of M-MLV RT (Invitrogen) and strand-specific primers. Following cDNA synthesis at  $37^\circ\text{C}$  for 1 h, the M-MLV RT was inactivated at  $80^\circ\text{C}$  for 10 min and samples were directly analyzed by qPCR. See Table S5 for primers used.

**Protein Analysis.** Five  $\text{OD}_{A600}$  of cells grown at  $30^\circ\text{C}$  were harvested and lysed in ice in the presence of 2N NaOH and 7.5%  $\beta$ -mercaptoethanol for 15 min with occasional vortexing. Extracts were treated with 55% TCA for 15 min before maximum speed centrifugation. Pellets were then resuspended in loading buffer (200 mM phosphate buffer, pH 6.8, 8 M urea, 5% SDS, 1 mM EDTA, 100 mM DTT, 0.08% bromophenol blue) and heat denatured at  $70^\circ\text{C}$  for 15 min. Following centrifugation, soluble fractions were recovered and the concentration was estimated using a Bio-Rad protein assay. Samples were analyzed by standard immunoblotting procedures using 1:3,000 horseradish peroxidase-conjugated antiperoxidase (PAP) (Sigma), 1:3,000 monoclonal anti-FLAG antibody (Sigma), and 1:4,000 polyclonal anti-Swi6 antibody (Abnova).

**Coimmunoprecipitation.** A total of 200 mL of cells was grown at  $30^\circ\text{C}$  until  $\text{OD} = 1.0$ – $1.5$  in all experiments. Cells were harvested by centrifugation, washed with ice-cold water, and resuspended in immunoprecipitation buffer (6 mM  $\text{Na}_2\text{HPO}_4$ , 4 mM  $\text{NaH}_2\text{PO}_4$ , 200 mM  $\text{Na}_2\text{H}_3\text{O}_2$ , 5 mM  $\text{MgC}_2\text{H}_3\text{O}_2$ , 0.25% Nonidet P-40, 2 mM EDTA, 1 mM EGTA, 5% glycerol, 1 mM PMSF, 1.3 mM benzamide and Roche complete EDTA-free protease inhibitor mixture). The suspension was then slowly dropped into liquid nitrogen to form “pop-corn” and lysis was performed using a ball mill (Retsch; MM400) for 15 min at a 10-Hz frequency. Extracts were then thawed and cleared by centrifugation before precipitation with 25  $\mu\text{L}$  IgG sepharose 6 fast flow beads (Amersham Biosciences) for 2–3 h at  $4^\circ\text{C}$ . For experiments with RNase A (Fermentas) or DNaseI (New England Biolabs), the enzyme was added for 20 min at  $25^\circ\text{C}$  before precipitation in the presence of

5 mM CaCl<sub>2</sub> at a concentration of 10 µg/mL extract or 50 unit/mL extract, respectively. Beads were then washed three times in immunoprecipitation buffer, transferred to new tubes, and washed two more times with immunoprecipitation buffer lacking Nonidet P-40 and protease inhibitors. Immunoprecipitated complexes and input extracts were analyzed by standard immunoblotting procedures using 1:3,000 horseradish peroxidase-conjugated antiperoxidase (PAP) (Sigma), 1:3,000 monoclonal anti-myc 9E10 antibody (Covance), 1:3,000 monoclonal anti-FLAG antibody (Sigma), and 1:4,000 polyclonal anti-Swi6 antibody (Abnova).

**RNA Immunoprecipitation.** A total of 250 mL of cells was grown in YES media at 30 °C until OD = 3–4, with an additional 1% of glucose added at OD of 1.0 to maintain logarithmic growth. Cells were in vivo cross-linked with 0.25% formaldehyde for 15 min at 30 °C and the reaction was quenched by the addition of 0.25 M glycine for 5 min at room temperature. Cells were then harvested by centrifugation, washed two times with ice-cold 1× PBS, and resuspended in RIPA buffer (1% Nonidet P-40, 0.5% sodium deoxycholate, 0.1% SDS, 150 mM NaCl, 50 mM Tris-HCl pH 8, 2 mM EDTA) supplemented with 1 mM PMSF and 40 unit/mL of murine RNase inhibitor (New England Biolabs). The sus-

pension was then slowly dropped into liquid nitrogen to form pop-corn and lysis was performed using a ball mill (Retsch; MM400) for 15 min at a 15-Hz frequency. Extracts were then thawed and cleared by centrifugation. Precipitation was carried out with 20 µL anti-FLAG M2 agarose resin (Sigma) for 2 h at 4 °C. Beads were subsequently transferred to Eppendorf tubes, rinsed one time with ice-cold RIPA buffer, washed one time with low salt buffer (150 mM NaCl, 10 mM Tris-HCl pH 7.5, 0.5% Triton X-100), two times with high salt buffer (1 M NaCl, 10 mM Tris-HCl pH 7.5, 0.5% Triton X-100), and one more time with low salt buffer for 10 min at room temperature. Then, reversal buffer (10 mM Tris-HCl pH 6.8, 5 mM EDTA, 10 mM DTT, 1% SDS) was added to samples for decross-link at 70 °C for 45 min. Tubes were incubated at 37 °C for 30 min in the presence of 40 µg proteinase K. RNAs were then extracted with acid-equilibrated (pH 4.7) phenol:chloroform and precipitated in 100% ethanol with 30 µg glycogen for 15 min in dry ice. Pellets were washed with 70% ethanol, resuspended in nuclease-free water, and treated with DNaseI (New England Biolabs). RT-qPCR analyses were then performed as described above with strand-specific primers and M-MLV RT (Invitrogen).

1. Rougemaille M, Shankar S, Braun S, Rowley M, Madhani HD (2008) Ers1, a rapidly diverging protein essential for RNA interference-dependent heterochromatic silencing in *Schizosaccharomyces pombe*. *J Biol Chem* 283:25770–25773.

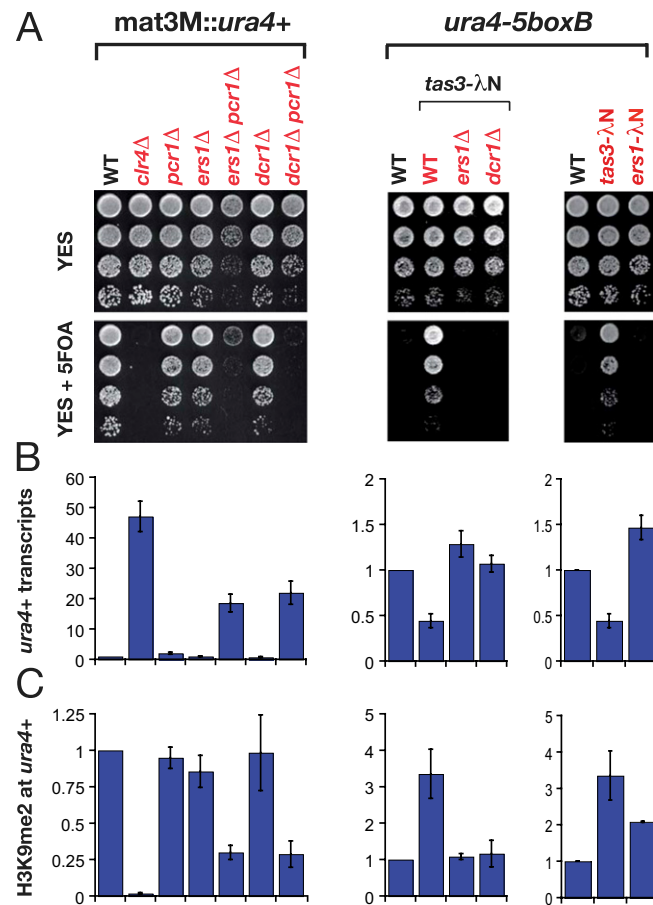

**Fig. S1.** Ers1 functions in the RNAi-dependent pathway of heterochromatic silencing but does not promote ectopic silencing. (*A, Left*) Silencing of a *ura4*<sup>+</sup> reporter gene inserted at the mating type locus (*mat3M::ura4*<sup>+</sup>) is severely compromised in *ers1Δ pcr1Δ* and *dcr1Δ pcr1Δ* cells. (*Center*) Silencing of the endogenous *ura4*<sup>+</sup> locus upon Tas3 tethering (*ura4-5boxB tas3-λN*) is completely abolished by the deletion of either *ers1*<sup>+</sup> or *dcr1*<sup>+</sup>. (*Right*) Silencing of the endogenous *ura4*<sup>+</sup> locus is not established upon Ers1 tethering. (*B*) RT-qPCR analysis of *ura4*<sup>+</sup> transcript levels normalized to a control transcript *act1*<sup>+</sup> and relative to wild type. Error bars represent SD from three experiments. (*C*) ChIP analysis of H3K9me2 levels at the *ura4*<sup>+</sup> locus, normalized to *act1*<sup>+</sup> and relative to wild type. Error bars represent the deviation from the mean of two experiments.

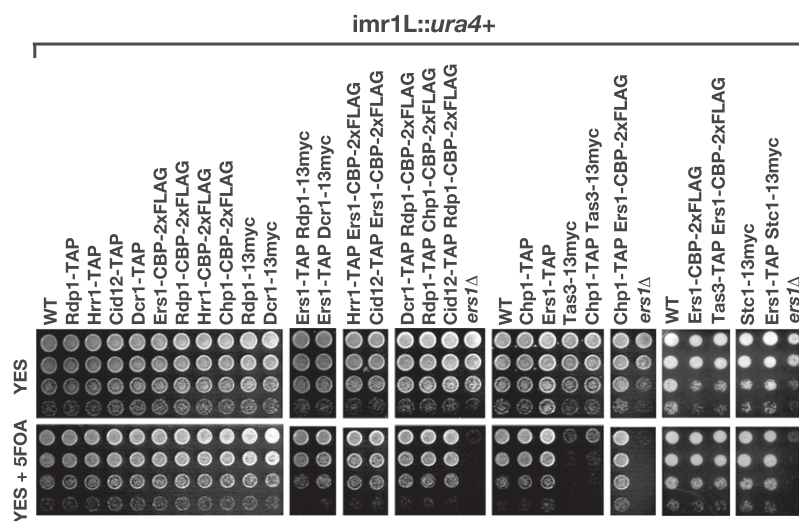

**Fig. S2.** Tagged strains used for immunoprecipitation experiments. Silencing of a *ura4*<sup>+</sup> reporter gene inserted at the centromeric inner repeats (*imr1L::ura4*<sup>+</sup>) is not affected in most tagged strains, indicating that proteins are functional for centromeric silencing. Note, however, that cells expressing Tas3-13myc are partially defective for silencing. A strain deleted for *ers1*<sup>+</sup> is used as a negative control.

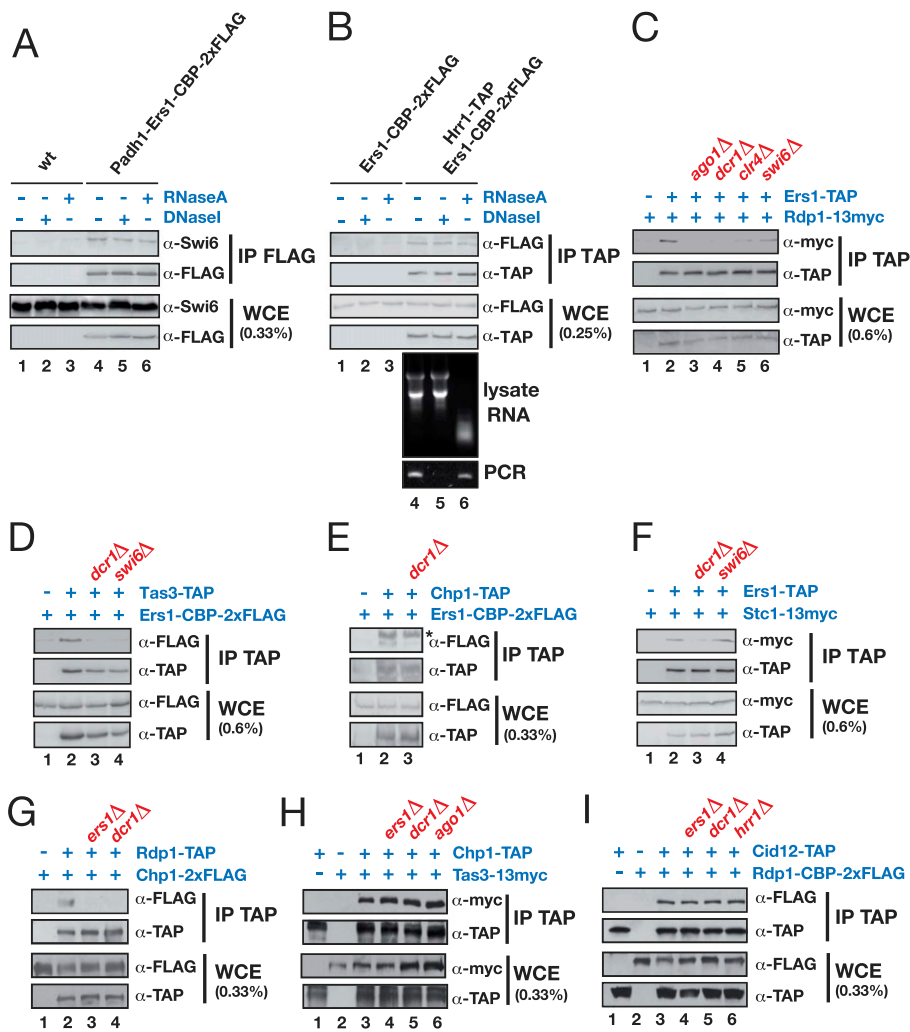

**Fig. S3.** Ers1 interacts with Swi6 and RNAi factors and is required for the formation of RNAi supercomplexes. Western blots showing that Ers1 associates with Swi6 (A) and Hrr1 (B) independently of DNA and RNA (compare lanes 4, 5, and 6). Agarose gels indicate the effects of DNaseI and RNaseA treatments of whole-cell extracts (B). (C, E, and F) Western blots showing that Ers1 interacts with Rdp1 (C), Chp1 (E), and Stc1 (F) in wild-type and *swi6Δ* cells but not in RNAi mutants (e.g., *ago1Δ* and/or *dcr1Δ*). (D) In contrast, Ers1 interacts with Tas3 in a Dcr1- and Swi6-dependent manner. (E) Asterisk denotes cross-hybridization with Chp1-TAP. (G) Western blot showing that, upon deletion of *ers1+*, Chp1-CBP-2xFLAG does not coprecipitate with Rdp1-TAP. (H and I) The interactions between Chp1-TAP and Tas3-13myc, as well as Cid12-TAP and Rdp1-CBP-2xFLAG, do not depend on *ers1+*.

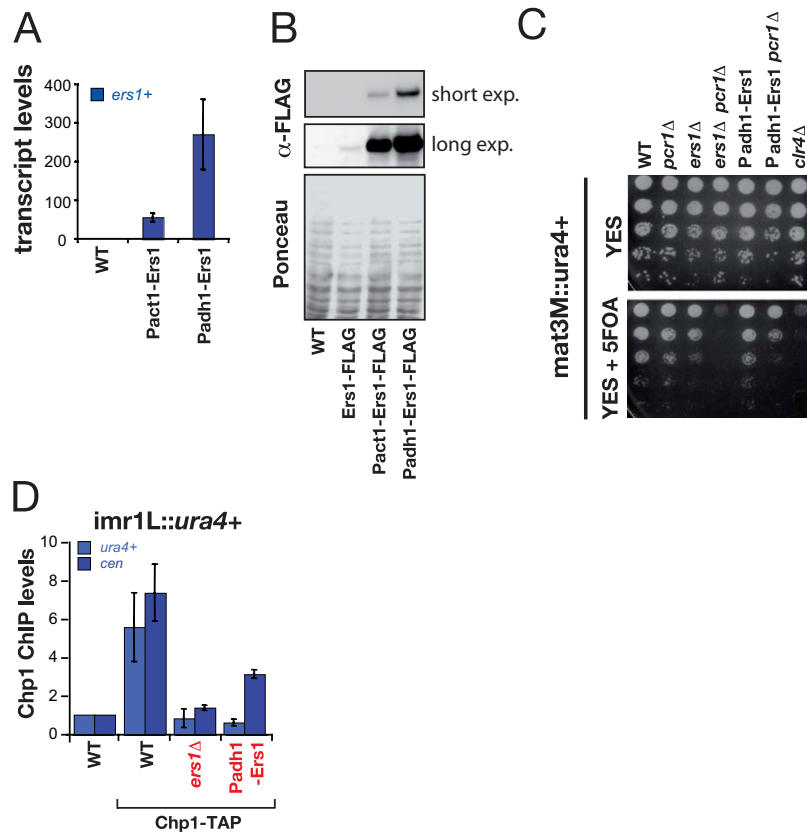

**Fig. S4.** Overexpression of Ers1 with the *adh1*<sup>+</sup> promoter disrupts silencing. (A) RT-qPCR analysis of *ers1*<sup>+</sup> transcript levels normalized to a control transcript *act1*<sup>+</sup> and relative to wild type. Error bars represent SD from three experiments. (B) Western blot showing FLAG-tagged Ers1 levels in wild-type cells and upon overexpression with the *act1*<sup>+</sup> or *adh1*<sup>+</sup> promoters. Shown are short and long exposures as well as a Ponceau staining used as loading control. (C) Silencing of a *ura4*<sup>+</sup> reporter gene inserted at the mating type locus (*mat3M::ura4*<sup>+</sup>) is partially defective in cells overexpressing Ers1 and lacking Pcr1. (D) ChIP analysis of Chp1-TAP levels at the *ura4*<sup>+</sup> and *cen* loci, normalized to *act1*<sup>+</sup> and relative to wild type. Error bars represent SD from three immunoprecipitations.

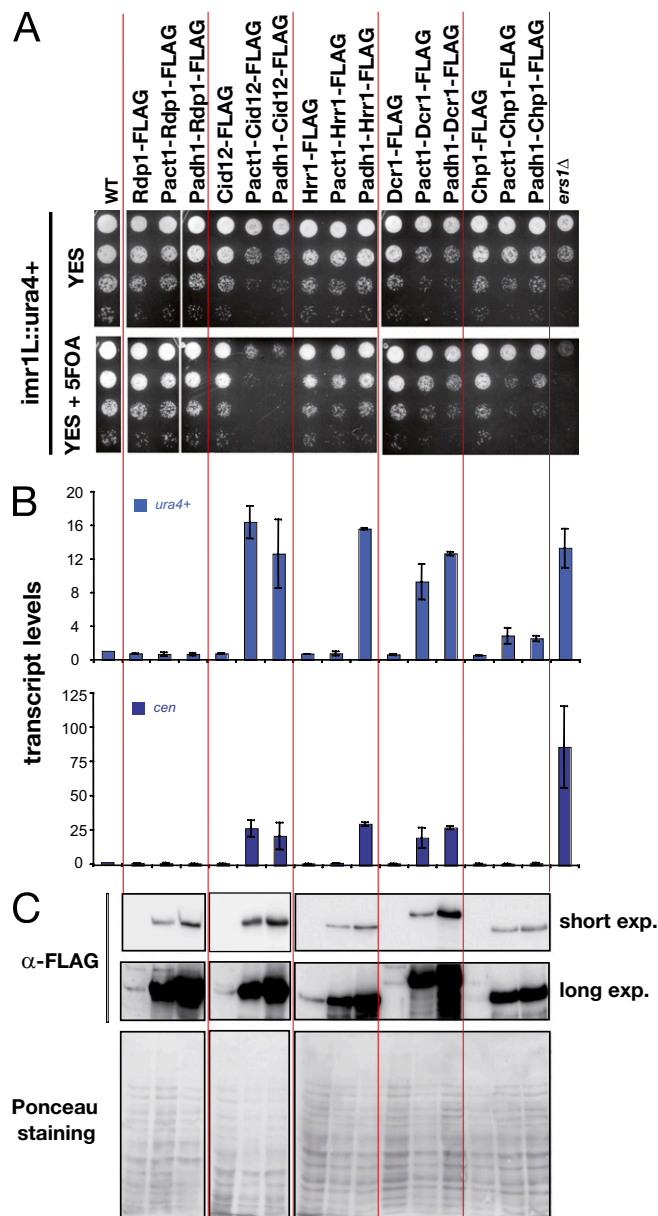

**Fig. S5.** Effects of overexpressing RNAi factors on pericentromeric silencing. (A) Silencing assay of a *ura4<sup>+</sup>* reporter gene inserted at the centromeric inner repeats (*imr1L::ura4<sup>+</sup>*) in cells overexpressing RNAi factors (e.g., Cid12, Rdp1, Hrr1, Dcr1, and Chp1) with the *act1<sup>+</sup>* or the *adh1<sup>+</sup>* promoter. An *ers1Δ* strain is used as a negative control. (B) RT-qPCR analysis of *ura4<sup>+</sup>* (Upper) and *cen* (Lower) transcript levels normalized to a control transcript *act1<sup>+</sup>* and relative to wild type. Error bars represent SD from three experiments. (C) Western blots showing expression levels of FLAG-tagged RNAi factors in wild-type cells and upon overexpression with the *act1<sup>+</sup>* or the *adh1<sup>+</sup>* promoter. Shown are short and long exposures as well as a Ponceau staining used as loading control.

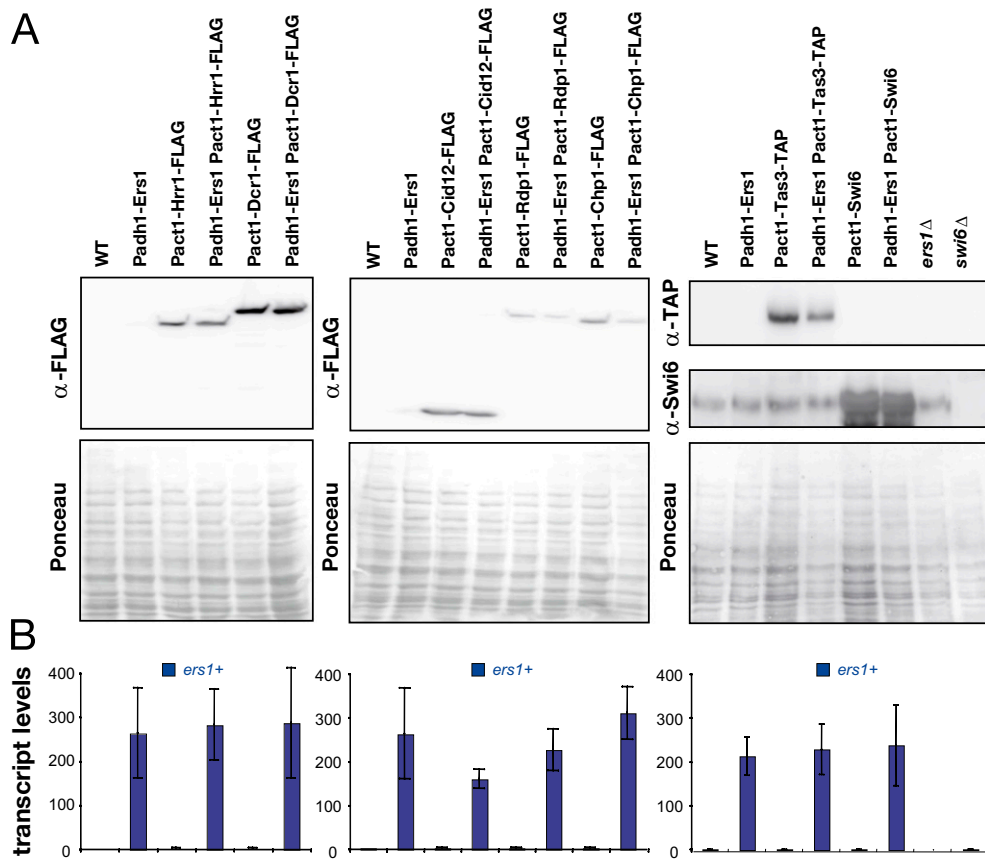

**Fig. S6.** Levels of RNAi factors and Swi6 upon overexpression. (A) Western blots showing expression levels of FLAG or TAP-tagged RNAi factors and Swi6 overexpressed with the *act1<sup>+</sup>* promoter. Shown is a short exposure and a Ponceau staining used as loading control. (B) RT-qPCR analysis of *ers1<sup>+</sup>* transcript levels normalized to a control transcript *act1<sup>+</sup>* and relative to wild type. Error bars represent SD from three experiments.

**Table S1.** Yeast two-hybrid fold over empty prey values for Fig. 1A

| Preys        | Baits        |             |             |             |              |             |             |             |             |
|--------------|--------------|-------------|-------------|-------------|--------------|-------------|-------------|-------------|-------------|
|              | <i>empty</i> | <i>ago1</i> | <i>chp1</i> | <i>tas3</i> | <i>cid12</i> | <i>hrr1</i> | <i>rdp1</i> | <i>dcr1</i> | <i>ers1</i> |
| <i>empty</i> | 1.0          | 1.0         | 1.0         | 1.0         | 1.0          | 1.0         | 1.0         | 1.0         | 1.0         |
| <i>ago1</i>  | 0.9          | 1.1         | 1.2         | 1.3         | 1.4          | 1.3         | 1.1         | 1.4         | 1.4         |
| <i>chp1</i>  | 0.6          | 1.2         | 0.4         | 0.6         | 0.4          | 0.3         | 0.7         | 1.2         | 0.3         |
| <i>tas3</i>  | 0.8          | 0.2         | <b>46.8</b> | 0.9         | <b>6.3</b>   | 1.2         | <b>49.1</b> | 0.1         | 0.5         |
| <i>cid12</i> | 0.1          | 1.4         | 0.2         | 0.5         | 0.6          | 0.1         | <b>2.8</b>  | 0.8         | 0.1         |
| <i>hrr1</i>  | 1.0          | 0.7         | 0.5         | 0.5         | <b>4.3</b>   | 1.3         | <b>17.3</b> | 1.0         | 1.6         |
| <i>rdp1</i>  | 1.5          | 1.0         | 0.9         | 0.8         | 0.4          | 1.0         | 0.5         | 1.1         | 1.1         |
| <i>dcr1</i>  | 0.4          | 0.8         | 0.3         | 0.8         | 0.1          | 0.8         | 0.3         | 0.3         | 1.3         |
| <i>ers1</i>  | 0.7          | 1.2         | 0.7         | 0.6         | 0.8          | 0.6         | 1.3         | 0.6         | 1.4         |

The fold  $\beta$ -galactosidase activity over the  $\beta$ -galactosidase activity of the empty prey was calculated for each bait-prey set. Values in bold are interactions meeting the following threshold: twofold enrichment in  $\beta$ -galactosidase activity over the empty prey.

**Table S2. Yeast two-hybrid fold over empty prey values for Fig. 1B with Ers1 fragments as bait**

| Baits      | Prey         |             |             |             |             |                  |                  |                  |                  |                  |                  |             |             |  |
|------------|--------------|-------------|-------------|-------------|-------------|------------------|------------------|------------------|------------------|------------------|------------------|-------------|-------------|--|
|            | <i>empty</i> | <i>clr4</i> | <i>raf1</i> | <i>raf2</i> | <i>rik1</i> | <i>swi6</i>      | <i>ago1</i>      | <i>chp1</i>      | <i>tas3</i>      | <i>cid12</i>     | <i>hrr1</i>      | <i>rdp1</i> | <i>dcr1</i> |  |
| Empty      | 1.0          | 0.5 (0.4)   | 0.6 (0.1)   | 0.6 (0.8)   | 0.2 (0.0)   | 0.0 (0.3)        | 0.7 (0.4)        | 0.6 (0.1)        | 0.8 (0.4)        | 1.0 (0.3)        | 1.1 (0.6)        | 0.7 (0.2)   | 0.3 (0.1)   |  |
| Fragment 1 | 1.0          | 0.9 (0.0)   | 0.9 (0.0)   | 1.4 (0.8)   | 0.1 (0.3)   | <b>3.4 (1.5)</b> | 1.0 (0.1)        | 1.2 (0.2)        | 1.8 (0.3)        | 1.9 (0.3)        | 2.0 (0.0)        | 1.4 (0.5)   | 0.6 (0.1)   |  |
| Fragment 2 | 1.0          | 0.6 (0.1)   | 0.7 (0.3)   | -0.1 (0.3)  | -1.1 (1.8)  | <b>7.4 (0.3)</b> | <b>2.2 (0.6)</b> | 1.4 (0.5)        | 1.4 (0.1)        | 1.5 (0.3)        | 2.0 (1.1)        | 1.3 (0.1)   | 0.8 (0.0)   |  |
| Fragment 3 | 1.0          | 1.2 (0.2)   | 1.5 (0.4)   | 1.3 (0.6)   | 1.4 (0.8)   | 1.7 (1.0)        | 1.5 (0.4)        | 1.3 (0.0)        | 1.0 (0.3)        | 1.3 (0.1)        | 1.5 (0.2)        | 1.5 (0.1)   | 1.4 (0.8)   |  |
| Fragment 4 | 1.0          | 0.9 (0.0)   | 1.5 (0.6)   | 0.4 (0.1)   | -0.8 (1.6)  | 0.8 (0.0)        | 1.5 (0.7)        | <b>2.3 (0.9)</b> | <b>2.3 (0.5)</b> | <b>3.0 (0.2)</b> | <b>3.2 (0.9)</b> | 3.1 (0.3)   | 0.9 (0.0)   |  |
| Fragment 5 | 1.0          | 0.9 (0.2)   | 1.3 (0.1)   | 0.7 (0.2)   | 0.8 (1.8)   | 1.2 (0.6)        | 1.4 (0.4)        | 1.9 (0.6)        | 1.8 (0.0)        | <b>3.4 (1.0)</b> | <b>3.8 (0.1)</b> | 2.6 (0.0)   | 1.5 (0.5)   |  |
| Fragment 6 | 1.0          | 0.4 (0.2)   | 1.0 (0.3)   | 0.3 (0.0)   | 0.9 (1.2)   | 0.2 (0.7)        | <b>2.2 (0.3)</b> | 1.7 (0.4)        | 2.0 (0.6)        | <b>3.6 (1.4)</b> | <b>3.7 (0.9)</b> | 2.8 (1.0)   | 2.3 (0.0)   |  |
| Fragment 7 | 1.0          | 1.1 (0.0)   | 1.0 (0.5)   | 0.6 (0.5)   | 1.4 (1.3)   | 1.0 (0.3)        | <b>2.1 (0.6)</b> | 1.9 (0.6)        | <b>2.1 (0.4)</b> | <b>2.4 (0.3)</b> | <b>2.6 (0.8)</b> | 2.4 (0.3)   | 1.7 (0.6)   |  |
| Fragment 8 | 1.0          | 0.8 (0.2)   | 1.1 (0.2)   | 0.7 (0.1)   | 1.0 (0.1)   | 0.9 (0.1)        | 1.1 (0.4)        | 0.6 (0.0)        | 0.9 (0.2)        | 0.9 (0.3)        | 1.1 (0.5)        | 1.0 (0.3)   | 0.8 (0.2)   |  |

The fold  $\beta$ -galactosidase activity over the  $\beta$ -galactosidase activity of the empty prey was calculated from two independent experiments. The mean of the two experiments for that bait-prey set is displayed above. The value in the parentheses is the deviation from the mean for the two experiments. Values in bold are interactions meet the following threshold: twofold enrichment in  $\beta$ -galactosidase activity over the empty prey in both experiments.

**Table S3. Yeast two-hybrid fold over empty prey values for Fig. 1B with Ers1 fragments as prey**

| Preys      | Baits        |             |             |             |             |             |             |             |                  |              |             |             |             |  |
|------------|--------------|-------------|-------------|-------------|-------------|-------------|-------------|-------------|------------------|--------------|-------------|-------------|-------------|--|
|            | <i>empty</i> | <i>clr4</i> | <i>raf1</i> | <i>raf2</i> | <i>rik1</i> | <i>swi6</i> | <i>ago1</i> | <i>chp1</i> | <i>tas3</i>      | <i>cid12</i> | <i>hrr1</i> | <i>rdp1</i> | <i>dcr1</i> |  |
| Fragment 1 | 0.6 (0.1)    | 0.9 (0.1)   | 0.8 (0.4)   | 0.5 (0.2)   | 1.2 (0.2)   | 1.1 (0.4)   | 0.4 (0.2)   | 1.4 (0.5)   | 1.0 (0.2)        | 1.3 (0.5)    | 0.6 (0.0)   | 1.2 (0.1)   | 0.7 (0.5)   |  |
| Fragment 2 | 0.4 (0.0)    | 2.4 (1.8)   | 0.7 (0.4)   | 4.4 (4.2)   | 1.2 (0.1)   | 0.9 (0.2)   | 0.6 (0.1)   | 1.0 (0.1)   | 1.1 (0.6)        | 0.8 (0.2)    | 0.7 (0.0)   | 0.5 (0.0)   | 0.6 (0.3)   |  |
| Fragment 3 | 0.5 (0.1)    | 0.5 (0.1)   | 1.4 (0.6)   | 1.2 (0.3)   | 0.9 (0.7)   | 0.6 (0.0)   | 2.2 (1.7)   | 0.8 (0.1)   | <b>6.7 (0.9)</b> | 1.3 (0.7)    | 0.6 (0.1)   | 0.8 (0.1)   | -0.3 (0.6)  |  |
| Fragment 4 | 0.5 (0.1)    | 0.6 (0.2)   | 1.1 (0.3)   | 0.9 (0.5)   | 0.9 (0.1)   | 0.5 (0.2)   | 0.4 (0.1)   | 0.5 (0.1)   | 0.5 (0.1)        | 0.5 (0.5)    | 0.5 (0.1)   | 0.6 (0.1)   | 0.4 (0.2)   |  |
| Fragment 5 | 0.8 (0.0)    | 0.8 (0.0)   | 1.2 (0.6)   | 1.2 (1.1)   | 0.8 (0.1)   | 0.7 (0.1)   | 0.7 (0.3)   | 0.8 (0.3)   | 0.7 (0.0)        | 0.6 (0.2)    | 0.3 (0.0)   | 0.8 (0.0)   | 0.8 (0.6)   |  |
| Fragment 6 | 0.5 (0.0)    | 0.7 (0.1)   | 0.5 (0.1)   | 0.8 (1.2)   | 0.7 (0.3)   | 0.9 (0.3)   | 0.7 (0.2)   | 0.9 (0.2)   | 0.8 (0.2)        | 0.6 (0.0)    | 0.3 (0.0)   | 0.6 (0.0)   | 0.5 (0.3)   |  |
| Fragment 7 | 0.5 (0.1)    | 0.4 (0.2)   | 0.4 (0.2)   | 0.1 (0.9)   | 0.5 (0.2)   | 0.5 (0.1)   | 0.4 (0.0)   | 0.5 (0.1)   | 0.6 (0.3)        | 0.8 (0.1)    | 0.3 (0.1)   | 0.7 (0.2)   | 0.5 (0.3)   |  |
| Fragment 8 | 0.6 (0.3)    | 0.6 (0.4)   | 0.3 (0.2)   | 0.8 (0.9)   | 0.5 (0.1)   | 0.5 (0.4)   | 0.6 (0.5)   | 1.3 (1.0)   | 0.5 (0.2)        | 0.4 (0.2)    | 0.3 (0.2)   | 0.5 (0.2)   | 0.6 (0.3)   |  |
| Empty      | 1.0          | 1.0         | 1.0         | 1.0         | 1.0         | 1.0         | 1.0         | 1.0         | 1.0              | 1.0          | 1.0         | 1.0         | 1.0         |  |

See Table S2.



**Table S4. *Schizosaccharomyces pombe* strains used in this study**

| Strain | Genotype                                                                                                              | Source     |
|--------|-----------------------------------------------------------------------------------------------------------------------|------------|
| PM021  | P(h <sup>+</sup> ), <i>ura4-DS/E, ade6-210, leu1-32, imr1L(Ncol)::ura4<sup>+</sup></i>                                | D. Moazed* |
| PM102  | <i>h90, ura4-DS/E, ade6-M210, leu1-32, mat3M::ura4<sup>+</sup></i>                                                    | D. Moazed  |
| PM104  | M(h <sup>-</sup> ), <i>ura4<sup>+</sup>::5BoxB-hphR, tas3<sup>+</sup>::λN-kanR</i>                                    | D. Moazed  |
| PM251  | P(h <sup>+</sup> ), <i>ura4-DS/E, ade6-210, leu1-32, imr1L(Ncol)::ura4<sup>+</sup>, otr1R(SphI)::ade6<sup>+</sup></i> | K. Ekwall† |
| PM333  | PM102, <i>clr4::kanMX</i>                                                                                             | (1)        |
| PM369  | PM251, <i>Ers1-TAP&lt;kanMX&gt;</i>                                                                                   | This study |
| PM408  | PM102, <i>ers1::natMX</i>                                                                                             | This study |
| PM410  | PM102, <i>dcr1::natMX</i>                                                                                             | This study |
| PM412  | PM104, <i>ers1::natMX</i>                                                                                             | This study |
| PM414  | PM104, <i>dcr1::natMX</i>                                                                                             | This study |
| PM416  | PM251, <i>ers1::natMX</i>                                                                                             | This study |
| PM418  | PM251, <i>dcr1::natMX</i>                                                                                             | This study |
| PM526  | PM102, <i>pcr1::kanMX</i>                                                                                             | This study |
| PM552  | PM251, <i>Chp1-TAP&lt;kanMX&gt;</i>                                                                                   | This study |
| PM554  | PM251, <i>ers1::natMX Chp1-TAP&lt;kanMX&gt;</i>                                                                       | This study |
| PM568  | PM251, <i>Ers1-CBP-2xFLAG&lt;kanMX&gt;</i>                                                                            | This study |
| PM592  | PM102, <i>ers1::natMX pcr1::kanMX</i>                                                                                 | This study |
| PM594  | PM102, <i>dcr1::natMX pcr1::kanMX</i>                                                                                 | This study |
| PM613  | M(h <sup>-</sup> ), <i>ura4<sup>+</sup>::5BoxB-hphR</i>                                                               | D. Moazed  |
| PM614  | M(h <sup>-</sup> ), <i>ura4<sup>+</sup>::5BoxB-hphR, ers1<sup>+</sup>::λN-kanR</i>                                    | This study |
| PM644  | PM251, <i>Rdp1-13myc&lt;hygMX&gt;</i>                                                                                 | This study |
| PM646  | PM251, <i>Ers1-TAP&lt;kanMX&gt; Rdp1-13myc&lt;hygMX&gt;</i>                                                           | This study |
| PM648  | PM251, <i>dcr1::natMX Ers1-TAP&lt;kanMX&gt; Rdp1-13myc&lt;hygMX&gt;</i>                                               | This study |
| PM658  | PM251, <i>Sap61-CBP-2xFLAG&lt;kanMX&gt;</i>                                                                           | This study |
| PM663  | PM251, <i>Cid12-TAP&lt;hygMX&gt;</i>                                                                                  | This study |
| PM677  | PM251, <i>Hrr1-CBP-2xFLAG&lt;kanMX&gt;</i>                                                                            | This study |
| PM679  | PM251, <i>Chp1-CBP-2xFLAG&lt;kanMX&gt;</i>                                                                            | This study |
| PM684  | PM251, <i>dcr1::natMX Ers1-CBP-2xFLAG&lt;kanMX&gt;</i>                                                                | This study |
| PM689  | PM251, <i>Tas3-13myc&lt;hygMX&gt;</i>                                                                                 | This study |
| PM691  | PM251, <i>Dcr1-13myc&lt;hygMX&gt;</i>                                                                                 | This study |
| PM696  | PM251, <i>Ers1-TAP&lt;kanMX&gt; Dcr1-13myc&lt;hygMX&gt;</i>                                                           | This study |
| PM702  | PM251, <i>ers1::natMX Hrr1-CBP-2xFLAG&lt;kanMX&gt;</i>                                                                | This study |
| PM712  | PM251, <i>Hrr1-TAP&lt;hygMX&gt; Ers1-CBP-2xFLAG&lt;kanMX&gt;</i>                                                      | This study |
| PM716  | PM251, <i>Rdp1-CBP-2xFLAG&lt;kanMX&gt;</i>                                                                            | This study |
| PM718  | PM251, <i>ers1::natMX Rdp1-CBP-2xFLAG&lt;kanMX&gt;</i>                                                                | This study |
| PM760  | PM251, <i>dcr1::natMX Hrr1-TAP&lt;hygMX&gt; Ers1-CBP-2xFLAG&lt;kanMX&gt;</i>                                          | This study |
| PM775  | PM251, <i>ago1::natMX Ers1-TAP&lt;kanMX&gt; Rdp1-13myc&lt;hygMX&gt;</i>                                               | This study |
| PM777  | PM251, <i>clr4::natMX Ers1-TAP&lt;kanMX&gt; Rdp1-13myc&lt;hygMX&gt;</i>                                               | This study |
| PM842  | PM251, <i>clr4::natMX</i>                                                                                             | This study |
| PM843  | PM251, <i>clr4::natMX Ers1-CBP-2xFLAG&lt;kanMX&gt;</i>                                                                | This study |
| PM845  | PM251, <i>ago1::natMX</i>                                                                                             | This study |
| PM847  | PM251, <i>ago1::natMX Ers1-CBP-2xFLAG&lt;kanMX&gt;</i>                                                                | This study |
| PM849  | PM251, <i>ers1::natMX Chp1-CBP-2xFLAG&lt;kanMX&gt;</i>                                                                | This study |
| PM853  | PM251, <i>Cid12-TAP&lt;hygMX&gt; Rdp1-CBP-2xFLAG&lt;kanMX&gt;</i>                                                     | This study |
| PM862  | PM251, <i>Dcr1-TAP&lt;hygMX&gt; Rdp1-CBP-2xFLAG&lt;kanMX&gt;</i>                                                      | This study |
| PM864  | PM251, <i>Chp1-TAP&lt;hygMX&gt; Ers1-CBP-2xFLAG&lt;kanMX&gt;</i>                                                      | This study |
| PM868  | PM251, <i>Rdp1-TAP&lt;hygMX&gt; Chp1-CBP-2xFLAG&lt;kanMX&gt;</i>                                                      | This study |
| PM872  | PM251, <i>Chp1-TAP&lt;kanMX&gt; Tas3-13myc&lt;hygMX&gt;</i>                                                           | This study |
| PM886  | PM251, <i>dcr1::natMX Cid12-TAP&lt;hygMX&gt; Rdp1-CBP-2xFLAG&lt;kanMX&gt;</i>                                         | This study |
| PM892  | PM251, <i>&lt;natMX&gt;-Pact1-Ers1</i>                                                                                | This study |
| PM894  | PM251, <i>&lt;natMX&gt;-Pact1-Ers1-CBP-2xFLAG&lt;kanMX&gt;</i>                                                        | This study |
| PM896  | PM251, <i>&lt;natMX&gt;-Padh1-Ers1</i>                                                                                | This study |
| PM898  | PM251, <i>&lt;natMX&gt;-Padh1-Ers1-CBP-2xFLAG&lt;kanMX&gt;</i>                                                        | This study |
| PM900  | PM251, <i>dcr1::natMX Chp1-TAP&lt;hygMX&gt; Ers1-CBP-2xFLAG&lt;kanMX&gt;</i>                                          | This study |
| PM902  | PM251, <i>ers1::natMX Rdp1-TAP&lt;hygMX&gt; Chp1-CBP-2xFLAG&lt;kanMX&gt;</i>                                          | This study |
| PM904  | PM251, <i>dcr1::natMX Rdp1-TAP&lt;hygMX&gt; Chp1-CBP-2xFLAG&lt;kanMX&gt;</i>                                          | This study |
| PM906  | PM251, <i>ers1::natMX Chp1-TAP&lt;kanMX&gt; Tas3-13myc&lt;hygMX&gt;</i>                                               | This study |
| PM908  | PM251, <i>dcr1::natMX Chp1-TAP&lt;kanMX&gt; Tas3-13myc&lt;hygMX&gt;</i>                                               | This study |
| PM910  | PM251, <i>ers1::natMX Dcr1-TAP&lt;hygMX&gt; Rdp1-CBP-2xFLAG&lt;kanMX&gt;</i>                                          | This study |
| PM912  | PM251, <i>hrr1::natMX Dcr1-TAP&lt;hygMX&gt; Rdp1-CBP-2xFLAG&lt;kanMX&gt;</i>                                          | This study |
| PM914  | PM251, <i>ers1::natMX Cid12-TAP&lt;hygMX&gt; Rdp1-CBP-2xFLAG&lt;kanMX&gt;</i>                                         | This study |
| PM916  | PM251, <i>hrr1::natMX Cid12-TAP&lt;hygMX&gt; Rdp1-CBP-2xFLAG&lt;kanMX&gt;</i>                                         | This study |
| PM917  | PM251, <i>ago1::natMX Chp1-TAP&lt;kanMX&gt; Tas3-13myc&lt;hygMX&gt;</i>                                               | This study |

Table S4. Cont.

| Strain | Genotype                                                                                    | Source     |
|--------|---------------------------------------------------------------------------------------------|------------|
| PM972  | PM251, <i>ago1::natMX</i> Ers1-TAP< <i>kanMX</i> > Dcr1-13myc< <i>hygMX</i> >               | This study |
| PM974  | PM251, <i>rdp1::natMX</i> Ers1-TAP< <i>kanMX</i> > Dcr1-13myc< <i>hygMX</i> >               | This study |
| PM976  | PM251, <i>clr4::natMX</i> Ers1-TAP< <i>kanMX</i> > Dcr1-13myc< <i>hygMX</i> >               | This study |
| PM986  | PM251, < <i>natMX</i> >-Padh1-Ers1 Chp1-TAP< <i>kanMX</i> >                                 | This study |
| PM989  | PM251, < <i>natMX</i> >-Padh1-Ers1 Chp1-CBP-2xFLAG< <i>kanMX</i> >                          | This study |
| PM991  | PM251, < <i>natMX</i> >-Padh1-Ers1 Rdp1-CBP-2xFLAG< <i>kanMX</i> >                          | This study |
| PM993  | PM251, < <i>natMX</i> >-Padh1-Rdp1-CBP-2xFLAG< <i>kanMX</i> >                               | This study |
| PM996  | PM251, < <i>natMX</i> >-Padh1-Ers1 Rdp1-TAP< <i>hygMX</i> > Chp1-CBP-2xFLAG< <i>kanMX</i> > | This study |
| PR001  | PM251, < <i>natMX</i> >-Padh1-Ers1 Dcr1-TAP< <i>hygMX</i> > Rdp1-CBP-2xFLAG< <i>kanMX</i> > | This study |
| PR003  | PM251, < <i>natMX</i> >-Padh1-Ers1-TAP < <i>kanMX</i> > Rdp1-13myc< <i>hygMX</i> >          | This study |
| PR004  | PM251, < <i>natMX</i> >-Padh1-Ers1-TAP < <i>kanMX</i> > Dcr1-13myc< <i>hygMX</i> >          | This study |
| PR005  | PM251, < <i>hygMX</i> >-Padh1-Ers1                                                          | This study |
| PR007  | PM102, < <i>hygMX</i> >-Padh1-Ers1                                                          | This study |
| PR008  | PM102, < <i>hygMX</i> >-Padh1-Ers1 pcr1:: <i>kanMX</i>                                      | This study |
| PR009  | PM251, < <i>hygMX</i> >-Pact1-Rdp1-CBP-2xFLAG< <i>kanMX</i> >                               | This study |
| PR010  | PM251, < <i>natMX</i> >-Pact1-Cid12-CBP-2xFLAG< <i>kanMX</i> >                              | This study |
| PR011  | PM251, < <i>natMX</i> >-Padh1-Cid12-CBP-2xFLAG< <i>kanMX</i> >                              | This study |
| PR012  | PM251, < <i>natMX</i> >-Pact1-Hrr1-CBP-2xFLAG< <i>kanMX</i> >                               | This study |
| PR013  | PM251, < <i>natMX</i> >-Padh1-Hrr1-CBP-2xFLAG< <i>kanMX</i> >                               | This study |
| PR014  | PM251, < <i>hygMX</i> >-Pact1-Dcr1-CBP-2xFLAG< <i>kanMX</i> >                               | This study |
| PR015  | PM251, < <i>natMX</i> >-Pact1-Dcr1-CBP-2xFLAG< <i>kanMX</i> >                               | This study |
| PR016  | PM251, < <i>natMX</i> >-Padh1-Dcr1-CBP-2xFLAG< <i>kanMX</i> >                               | This study |
| PR017  | PM251, < <i>natMX</i> >-Pact1-Chp1-CBP-2xFLAG< <i>kanMX</i> >                               | This study |
| PR018  | PM251, < <i>hygMX</i> >-Padh1-Chp1-CBP-2xFLAG< <i>kanMX</i> >                               | This study |
| PR023  | PM251, < <i>natMX</i> >-Padh1-Ers1 < <i>hygMX</i> >-Pact1-Rdp1-CBP-2xFLAG< <i>kanMX</i> >   | This study |
| PR024  | PM251, < <i>hygMX</i> >-Padh1-Ers1 < <i>natMX</i> >-Pact1-Cid12-CBP-2xFLAG< <i>kanMX</i> >  | This study |
| PR025  | PM251, < <i>natMX</i> >-Padh1-Ers1 < <i>hygMX</i> >-Pact1-Hrr1-CBP-2xFLAG< <i>kanMX</i> >   | This study |
| PR026  | PM251, < <i>natMX</i> >-Padh1-Ers1 < <i>hygMX</i> >-Pact1-Dcr1-CBP-2xFLAG< <i>kanMX</i> >   | This study |
| PR027  | PM251, < <i>hygMX</i> >-Padh1-Ers1 < <i>natMX</i> >-Pact1-Dcr1-CBP-2xFLAG< <i>kanMX</i> >   | This study |
| PR028  | PM251, < <i>natMX</i> >-Padh1-Ers1 < <i>hygMX</i> >-Pact1-Chp1-CBP-2xFLAG< <i>kanMX</i> >   | This study |
| PR063  | PM251, <i>swi6::hygMX</i>                                                                   | This study |
| PR069  | PM251, < <i>kanMX</i> >-Pact1-Swi6                                                          | This study |
| PR071  | PM251, <i>Tas3-TAP&lt;kanMX&gt;</i> Ers1-CBP-2xFLAG< <i>kanMX</i> >                         | This study |
| PR075  | PM251, < <i>hygMX</i> >-Pact1-Tas3-TAP< <i>kanMX</i> >                                      | This study |
| PR076  | PM251, < <i>natMX</i> >-Padh1-Ers1 < <i>kanMX</i> >-Pact1-Swi6                              | This study |
| PR077  | PM251, <i>swi6::hygMX</i> Chp1-CBP-2xFLAG< <i>kanMX</i> >                                   | This study |
| PR078  | PM251, <i>swi6::hygMX</i> Hrr1-CBP-2xFLAG< <i>kanMX</i> >                                   | This study |
| PR079  | PM251, <i>swi6::hygMX</i> Rdp1-CBP-2xFLAG< <i>kanMX</i> >                                   | This study |
| PR080  | PM251, <i>swi6::natMX</i> <i>Tas3-TAP&lt;kanMX&gt;</i> Ers1-CBP-2xFLAG< <i>kanMX</i> >      | This study |
| PR081  | PM251, <i>swi6::natMX</i> Hrr1-TAP< <i>hygMX</i> > Ers1-CBP-2xFLAG< <i>kanMX</i> >          | This study |
| PR082  | PM251, <i>swi6::natMX</i> Ers1-TAP < <i>kanMX</i> > Rdp1-13myc< <i>hygMX</i> >              | This study |
| PR084  | PM251, <i>swi6::natMX</i> Dcr1-TAP< <i>hygMX</i> > Rdp1-CBP-2xFLAG< <i>kanMX</i> >          | This study |
| PR085  | PM251, < <i>natMX</i> >-Padh1-Ers1 < <i>hygMX</i> >-Pact1-Tas3-TAP< <i>kanMX</i> >          | This study |
| PR088  | PM251, <i>Stc1-13myc&lt;hygMX&gt;</i>                                                       | This study |
| PR089  | PM251, <i>dcr1::natMX</i> <i>Tas3-TAP&lt;kanMX&gt;</i> Ers1-CBP-2xFLAG< <i>kanMX</i> >      | This study |
| PR090  | PM251, <i>swi6::natMX</i> Ers1-TAP < <i>kanMX</i> > Dcr1-13myc< <i>hygMX</i> >              | This study |
| PR097  | PM251, <i>ago1::natMX</i> Hrr1-TAP< <i>hygMX</i> > Ers1-CBP-2xFLAG< <i>kanMX</i> >          | This study |
| PR098  | PM251, <i>clr4::natMX</i> Hrr1-TAP< <i>hygMX</i> > Ers1-CBP-2xFLAG< <i>kanMX</i> >          | This study |
| PR099  | PM251, Ers1-TAP < <i>kanMX</i> > <i>Stc1-13myc&lt;hygMX&gt;</i>                             | This study |
| PR100  | PM251, <i>swi6::natMX</i> Ers1-TAP < <i>kanMX</i> > <i>Stc1-13myc&lt;hygMX&gt;</i>          | This study |
| PR101  | PM251, <i>dcr1::natMX</i> Ers1-TAP < <i>kanMX</i> > <i>Stc1-13myc&lt;hygMX&gt;</i>          | This study |
| PR102  | PM251, < <i>natMX</i> >-Ers1 <i>fragment2Δ</i> -CBP-2xFLAG< <i>kanMX</i> >                  | This study |
| PR104  | PM251, < <i>natMX</i> >-Padh1-Ers1 <i>fragment2Δ</i> -CBP-2xFLAG< <i>kanMX</i> >            | This study |

\*Howard Hughes Medical Institute, Department of Cell Biology, Harvard Medical School, Boston, MA.

†Center for Biosciences, Department of Biosciences and Nutrition, Karolinska Institute, Huddinge, Sweden.

**Table S5. Primers used in this study**

| Primers                             | Sequence                        | Experiments    |
|-------------------------------------|---------------------------------|----------------|
| P581: <i>ura4</i> <sup>+</sup> fwd  | 5'-CAGCAATATCGTACTCCTGAA-3'     | qPCR           |
| P582: <i>ura4</i> <sup>+</sup> rev  | 5'-ATGCTGAGAAAAGTCTTTGCTG-3'    | qPCR           |
| P638: <i>act1</i> <sup>+</sup> fwd  | 5'-AACCTCAGCTTTGGGTCTT-3'       | qPCR           |
| P639: <i>act1</i> <sup>+</sup> rev  | 5'-TTTGATACGATCGGCAATA-3'       | qPCR           |
| P972: <i>U2</i> fwd                 | 5'-GGCTTAGATCAAGTGTAGTATCTGT-3' | qPCR           |
| P978: <i>U2</i> rev                 | 5'-CAACTCAAACAAAAACAAG-3'       | qPCR           |
| P1044: <i>cen</i> fwd               | 5'-CCATCACCCTTTCATCTCC-3'       | qPCR           |
| P1045: <i>cen</i> rev               | 5'-CAGGATACCTAGACGCACAA-3'      | qPCR           |
| PR37: <i>ers1</i> <sup>+</sup> fwd  | 5'-CAGCAATTCAAAGTCATAGTG-3'     | Diagnostic PCR |
| PR47: <i>ers1</i> <sup>+</sup> rev  | 5'-TGTCTGATCGTTATTGGCT-3'       | qPCR           |
| PR49: <i>ers1</i> <sup>+</sup> fwd  | 5'-CTACTGTTTACAACGGGAGTTTC-3'   | qPCR           |
| PR188: <i>ers1</i> <sup>+</sup> rev | 5'-CAAGCTCTAAACATTCTACT-3'      | Diagnostic PCR |

**Table S6. Yeast two-hybrid plasmids used in this study**

| Vector  | Insert                 | Strain  | Source     |
|---------|------------------------|---------|------------|
| pEG202  | <i>Ers1 fragment 1</i> | BHM1809 | This study |
| pEG202  | <i>Ers1 fragment 2</i> | BHM1810 | This study |
| pEG202  | <i>Ers1 fragment 3</i> | BHM1811 | This study |
| pEG202  | <i>Ers1 fragment 4</i> | BHM1812 | This study |
| pEG202  | <i>Ers1 fragment 5</i> | BHM1813 | This study |
| pEG202  | <i>Ers1 fragment 6</i> | BHM1814 | This study |
| pEG202  | <i>Ers1 fragment 7</i> | BHM1815 | This study |
| pEG202  | <i>Ers1 fragment 8</i> | BHM1816 | This study |
| pEG202  | <i>clr4</i>            | BHM1744 | This study |
| pEG202  | <i>raf1</i>            | BHM1719 | This study |
| pEG202  | <i>raf2</i>            | BHM1745 | This study |
| pEG202  | <i>rik1</i>            | BHM1759 | This study |
| pEG202  | <i>swi6</i>            | BHM1717 | This study |
| pEG202  | <i>ago1</i>            | BHM1689 | This study |
| pEG202  | <i>chp1</i>            | BHM1671 | This study |
| pEG202  | <i>tas3</i>            | BHM1678 | This study |
| pEG202  | <i>cid12</i>           | BHM1672 | This study |
| pEG202  | <i>hrr1</i>            | BHM1675 | This study |
| pEG202  | <i>rdp1</i>            | BHM1676 | This study |
| pEG202  | <i>dcr1</i>            | BHM1673 | This study |
| pEG202  | <i>ers1</i>            | BHM1674 | This study |
| pEG202  | <i>No insert</i>       | BHM1757 | (1)        |
| pJSC401 | <i>Ers1 fragment 1</i> | BHM1817 | This study |
| pJSC401 | <i>Ers1 fragment 2</i> | BHM1818 | This study |
| pJSC401 | <i>Ers1 fragment 3</i> | BHM1819 | This study |
| pJSC401 | <i>Ers1 fragment 4</i> | BHM1820 | This study |
| pJSC401 | <i>Ers1 fragment 5</i> | BHM1821 | This study |
| pJSC401 | <i>Ers1 fragment 6</i> | BHM1822 | This study |
| pJSC401 | <i>Ers1 fragment 7</i> | BHM1823 | This study |
| pJSC401 | <i>Ers1 fragment 8</i> | BHM1824 | This study |
| pJSC401 | <i>clr4</i>            | BHM1670 | This study |
| pJSC401 | <i>raf1</i>            | BHM1751 | This study |
| pJSC401 | <i>raf2</i>            | BHM1712 | This study |
| pJSC401 | <i>rik1</i>            | BHM1752 | This study |
| pJSC401 | <i>swi6</i>            | BHM1760 | This study |
| pJSC401 | <i>ago1</i>            | BHM1710 | This study |
| pJSC401 | <i>chp1</i>            | BHM1687 | This study |
| pJSC401 | <i>tas3</i>            | BHM1679 | This study |
| pJSC401 | <i>cid12</i>           | BHM1686 | This study |
| pJSC401 | <i>hrr1</i>            | BHM1680 | This study |
| pJSC401 | <i>rdp1</i>            | BHM1683 | This study |
| pJSC401 | <i>dcr1</i>            | BHM1684 | This study |
| pJSC401 | <i>ers1</i>            | BHM1681 | This study |
| pJSC401 | <i>No insert</i>       | BHM1682 | (1)        |

1. Golemis, et al. (2009) Interaction trap/two-hybrid system to identify interacting proteins. *Curr Protoc Protein Sci*, Chapter 19: Unit 19.2.
